# Supplementary material
Source: HighWire-hosted journal article supplement (https://www.rcpjournals.org/highwire/filestream/10805/field_highwire_adjunct_files/4/S5_AIC_path_of_LASSO_analysis.pdf)

### S5. Akaike's information criterion (AIC) path of LASSO analysis

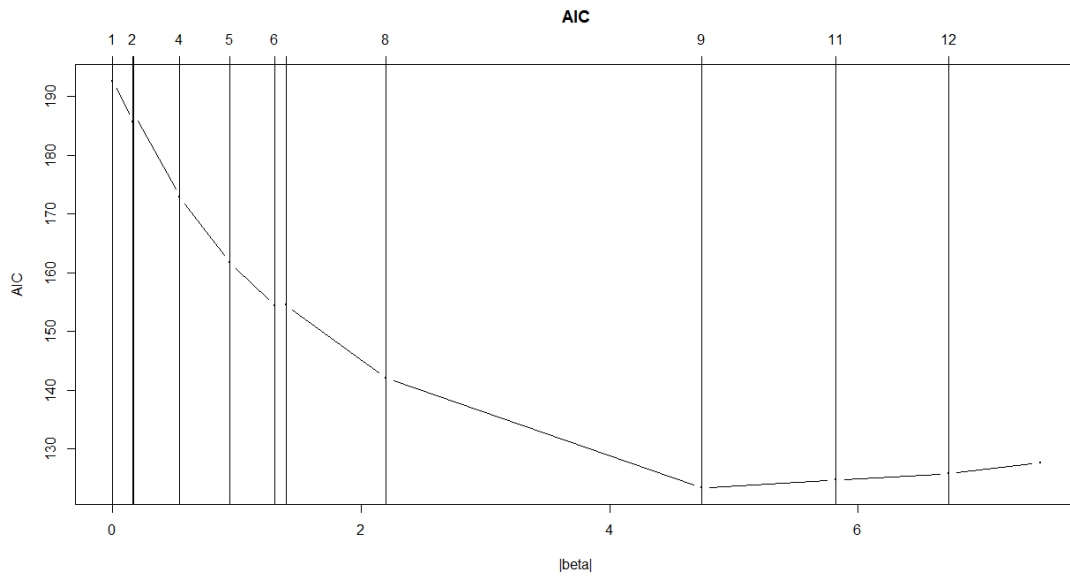

Supplement: S5_AIC_path_of_LASSO_analysis.pdf [file S5_AIC_path_of_LASSO_analysis.pdf]
